# Supplementary material
Source: PubMed Central journal article supplement (PMC2504902)
Supplement: M802555200_1.pdf [file M802555200_1.pdf]

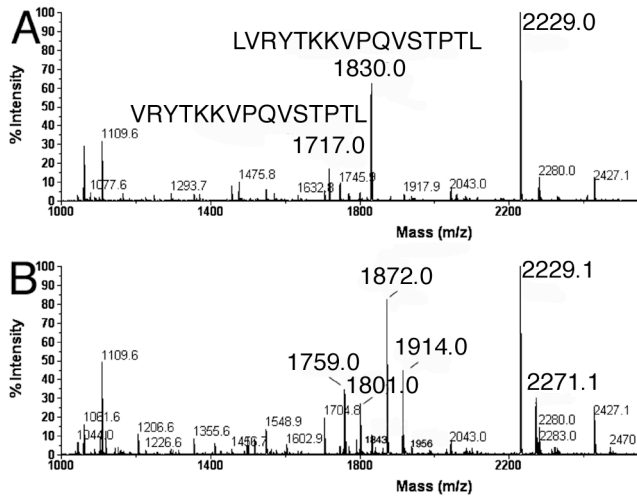

Figure S1. MALDI-TOF mass spectra of pepsin digested human albumin (15  $\mu$ M) before (A) and after (B) treatment with 0.5 mM p-nitrophenyl acetate for 6 h. The 1717 amu peak for VRYTKKVPQVSTPTL in panel A has acquired +42, +84, and +126 amu masses at 1759, 1801, and 1843 amu in panel B. The 1830 amu peak for LVRYTKKVPQVSTPTL in panel A has acquired +42, +84, and +126 amu masses in panel B at 1872, 1914, and 1956 amu.

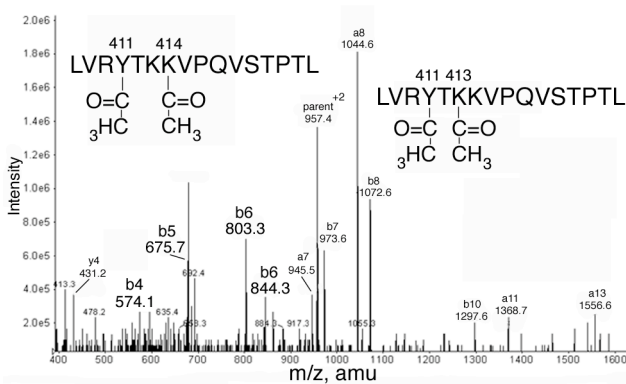

Figure S2. MS/MS spectrum to identify acetylated sites in LVRYTKKVPQVSTPTL after 6 h reaction of 1 mg/ml albumin with 0.5 mM p-nitrophenyl acetate. The doubly charged parent ion at 957.4 m/z, representing the singly charged 1914 amu ion, carries two acetyl groups. The acetyl groups are distributed between Y411/K414 and Y411/K413. The dominant ion is acetylated on Y411 and K414, while a less abundant ion is acetylated on Y411 and K413.

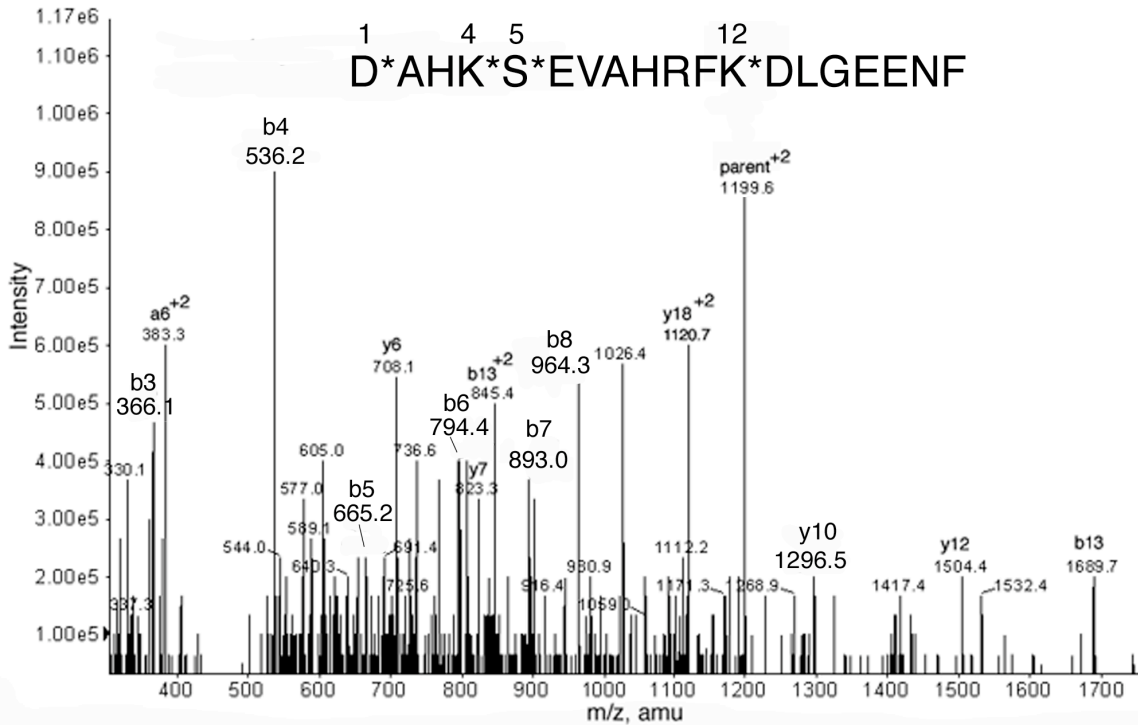

Figure S3. MS/MS spectrum to identify 4 acetylation sites on DAHKSEVAHRFKDLGEENF. Human albumin (15  $\mu$ M) was incubated with 10 mM p-nitrophenyl acetate for 48 h at pH 8.0, before digestion with pepsin. The 4 acetylated residues in ion 2397 are D1, K4, S5, and K12.

Table S1. Mass spectrometry identification of residues in human albumin (accession number gi: 3212456) acetylated by 10 mM p-nitrophenyl acetate.

| Start - End | Mr      | Sequence                                 | Acetylated          | Protease | missed cleavages |
|-------------|---------|------------------------------------------|---------------------|----------|------------------|
| 1 - 19      | 2396.06 | DAHKSEVAHRFKDLGEENF                      | D1 K4 S5 K12        | pepsin   | 4                |
| 1 - 20      | 2482.19 | DAHKSEVAHRFKDLGEENFK                     | D1 K4 K12           | trypsin  | 3                |
| 7 - 17      | 1341.67 | VAHRFKDLGEE                              | K12                 | Glu-C    | 1                |
| 11 - 20     | 1267.61 | FKDLGEENFK                               | K12                 | trypsin  | 1                |
| 18 - 45     | 3417.74 | NFKALVLIIFAQYLQQCPFEDHVKLVNE             | K20 K41             | Glu-C    | 1                |
| 18 - 45     | 3375.73 | NFKALVLIIFAQYLQQCPFEDHVKLVNE             | K41                 | Glu-C    | 1                |
| 42 - 64     | 2670.18 | LVNEVTEFAKTCVADESAENCDK                  | K51                 | trypsin  | 1                |
| 49 - 57     | 1081.47 | FAKTCVADE                                | K51                 | Glu-C    | 0                |
| 49 - 60     | 1368.59 | FAKTCVADESAE                             | K51                 | Glu-C    | 1                |
| 61 - 82     | 2661.29 | NCDKSLHTLFGDKLCTVATLRE                   | K64 K73             | Glu-C    | 0                |
| 61 - 82     | 2619.28 | NCDKSLHTLFGDKLCTVATLRE                   | K73                 | Glu-C    | 0                |
| 61 - 82     | 2661.29 | NCDKSLHTLFGDKLCTVATLRE                   | S65 K73             | Glu-C    | 0                |
| 65 - 81     | 2015.05 | SLHTLFGDKLCTVATLR                        | S65 K73             | trypsin  | 1                |
| 65 - 81     | 2015.05 | SLHTLFGDKLCTVATLR                        | T68 K73             | trypsin  | 1                |
| 65 - 81     | 1973.04 | SLHTLFGDKLCTVATLR                        | T76                 | trypsin  | 1                |
| 65 - 81     | 1973.04 | SLHTLFGDKLCTVATLR                        | K73                 | trypsin  | 1                |
| 74 - 98     | 3171.36 | LCTVATLRETYGEM <sub>ox</sub> ADCCAQQEPER | T76 T79 T83 K93     | trypsin  | 2                |
| 74 - 98     | 3197.38 | LCTVATLRETYGEMADCCAQQEPER                | T76 T79 T83 Y84 K93 | trypsin  | 2                |
| 82 - 98     | 2114.83 | ETYGEMADCCAQQEPER                        | K93                 | trypsin  | 1                |
| 87 - 100    | 1778.70 | MADCCAQQEPERNE                           | K93                 | Glu-C    | 2                |
| 101 - 119   | 2389.20 | CFLQHKDDPNLPRLVRPE                       | K106                | Glu-C    | 0                |
| 133 - 141   | 1245.66 | TFLKKYLYE                                | K137                | Glu-C    | 0                |
| 133 - 141   | 1287.68 | TFLKKYLYE                                | K136 K137           | Glu-C    | 0                |

|           |         |                            |                     |         |   |
|-----------|---------|----------------------------|---------------------|---------|---|
| 137 - 144 | 1096.59 | KYLYEIAR                   | K137                | trypsin | 1 |
| 146 - 162 | 2315.18 | HPYFYAPELLFFAKRYK          | K159 Y161 K162      | trypsin | 2 |
| 154 - 167 | 1745.95 | LLFFAKRYKAAFTE             | K159                | Glu-C   | 0 |
| 154 - 167 | 1745.95 | LLFFAKRYKAAFTE             | Y161                | Glu-C   | 0 |
| 154 - 167 | 1787.96 | LLFFAKRYKAAFTE             | Y161 K162           | Glu-C   | 0 |
| 154 - 167 | 1787.96 | LLFFAKRYKAAFTE             | K159 K162           | Glu-C   | 0 |
| 161 - 174 | 1703.73 | YKAAFTECCQAADK             | K162                | trypsin | 1 |
| 161 - 181 | 2499.16 | YKAAFTECCQAADKAAACLLPK     | K162 K174           | trypsin | 2 |
| 161 - 186 | 3167.51 | YKAAFTECCQAADKAAACLLPKLDEL | K162 K174 K181      | trypsin | 3 |
| 163 - 181 | 2165.99 | AAFTECCQAADKAAACLLPK       | K174                | trypsin | 1 |
| 168 - 184 | 2003.91 | CCQAADKAAACLLPKLDE         | K174                | Glu-C   | 0 |
| 168 - 184 | 2045.92 | CCQAADKAAACLLPKLDE         | K174 K181           | Glu-C   | 0 |
| 168 - 188 | 2517.17 | CCQAADKAAACLLPKLDEL        | K174                | Glu-C   | 1 |
| 168 - 188 | 2559.18 | CCQAADKAAACLLPKLDEL        | K174 K181           | Glu-C   | 1 |
| 175 - 186 | 1439.78 | AAACLLPKLDEL               | K181                | trypsin | 1 |
| 175 - 195 | 2313.20 | AAACLLPKLDELDEGKASSAK      | K190                | trypsin | 3 |
| 182 - 197 | 1885.95 | LDELDEGKASSAKQR            | K190 K195           | trypsin | 3 |
| 182 - 197 | 1927.96 | LDELDEGKASSAKQR            | K190 S192 K195      | trypsin | 3 |
| 189 - 208 | 2319.20 | GKASSAKQRLKCASLQKFGE       | K190 K195 K199      | Glu-C   | 0 |
| 189 - 208 | 2361.21 | GKASSAKQRLKCASLQKFGE       | K190 K195 K199 K205 | Glu-C   | 0 |
| 198 - 209 | 1519.78 | LKCASLQKFGER               | K199 K205           | trypsin | 2 |
| 198 - 209 | 1561.79 | LKCASLQKFGER               | K199 S202 K205      | trypsin | 2 |
| 210 - 218 | 1060.58 | AFKAWAVAR                  | K212                | trypsin | 1 |
| 223 - 233 | 1293.66 | FPKAEFAEVSK                | K225                | trypsin | 1 |
| 223 - 240 | 2106.12 | FPKAEFAEVSKLVTDLTK         | K225 K233           | trypsin | 2 |
| 234 - 257 | 2898.29 | LVTDLTKVHTECCHGDLLECADDR   | K240                | trypsin | 1 |
| 245 - 266 | 2725.12 | CCHGDLLECADDRADLAKYICE     | K262                | Glu-C   | 1 |
| 253 - 266 | 1740.74 | CADDRADLAKYICE             | K262                | Glu-C   | 0 |
| 258 - 274 | 1982.93 | ADLAKYICENQDSISSK          | K262                | trypsin | 1 |
| 258 - 276 | 2266.12 | ADLAKYICENQDSISSK          | K262 K274           | trypsin | 2 |
| 263 - 276 | 1725.82 | YICENQDSISSK               | K274                | trypsin | 1 |
| 267 - 277 | 1289.65 | NQDSISSK                   | K274                | Glu-C   | 0 |
| 267 - 277 | 1331.66 | NQDSISSK                   | K274 K276           | Glu-C   | 0 |
| 275 - 286 | 1629.81 | LKECCEKPLEK                | K276 K281           | trypsin | 2 |
| 286 - 292 | 927.41  | KSHCIAE                    | K286 S287           | Glu-C   | 0 |
| 312 - 321 | 1296.57 | SKDVCKNYAE                 | S312 K317           | Glu-C   | 0 |
| 312 - 321 | 1296.57 | SKDVCKNYAE                 | K313 K317           | Glu-C   | 0 |
| 318 - 336 | 2341.11 | NYAEAKDVFLGMFLYEYAR        | K323                | trypsin | 1 |
| 322 - 333 | 1473.72 | AKDVFLGMFLYE               | K323                | Glu-C   | 0 |
| 349 - 359 | 1337.71 | LAKTYETTLEK                | K351                | trypsin | 1 |
| 349 - 372 | 2913.30 | LAKTYETTLEKCCAAADPHECYAK   | K351 K359           | trypsin | 2 |
| 359 - 376 | 2211.90 | KCCAAADPHECYAKVFDE         | K359                | Glu-C   | 1 |
| 359 - 376 | 2253.91 | KCCAAADPHECYAKVFDE         | K359 K372           | Glu-C   | 1 |
| 369 - 376 | 1072.45 | CYAKVFDE                   | K372                | Glu-C   | 0 |
| 377 - 393 | 2127.07 | FKPLVEEPQNLKQNC            | K378                | Glu-C   | 2 |
| 377 - 393 | 2169.08 | FKPLVEEPQNLKQNC            | K378 K389           | Glu-C   | 2 |
| 390 - 410 | 2640.30 | QNCLEFQGLGEYKFQNAL         | K402                | trypsin | 1 |
| 390 - 410 | 2640.30 | QNCLEFQGLGEYKFQNAL         | Y401                | trypsin | 1 |
| 401 - 425 | 3047.67 | YKFQNALVRYTKKVPQVSTPTL     | Y401 K402 K413      | Glu-C   | 0 |
| 408 - 423 | 1997.08 | LVRYTKKVPQVSTPTL           | Y411 K413 K414 S419 | pepsin  | 2 |
| 409 - 423 | 1883.99 | VRYTKKVPQVSTPTL            | Y411 K413 K414 S419 | pepsin  | 1 |
| 411 - 428 | 2115.16 | YTKKVPQVSTPTLVEVSR         | K413 K414           | trypsin | 2 |
| 411 - 428 | 2157.17 | YTKKVPQVSTPTLVEVSR         | K413 K414 S419      | trypsin | 2 |
| 414 - 428 | 1680.94 | KVPQVSTPTLVEVSR            | K414                | trypsin | 1 |
| 414 - 428 | 1722.95 | KVPQVSTPTLVEVSR            | K414 S419           | trypsin | 1 |
| 426 - 442 | 2039.00 | VSRNLGKVGSKCKHPE           | K432 K436           | Glu-C   | 0 |
| 426 - 442 | 2081.01 | VSRNLGKVGSKCKHPE           | K432 K436 K439      | Glu-C   | 0 |

|           |         |                                            |                     |         |   |
|-----------|---------|--------------------------------------------|---------------------|---------|---|
| 426 - 442 | 2081.01 | VSRNLGKVGSKCKHPE                           | S427 K436 K439      | Glu-C   | 0 |
| 426 - 442 | 2123.03 | VSRNLGKVGSKCKHPE                           | K432 S435 K436 K439 | Glu-C   | 0 |
| 429 - 439 | 1333.65 | NLGKVGSKCK                                 | K432 K436           | trypsin | 2 |
| 429 - 444 | 1937.95 | NLGKVGSKCKHPEAK                            | K432 K436 K439      | trypsin | 3 |
| 440 - 466 | 3293.60 | HPEAKRM <sub>ox</sub> PCAEDYLSVVLNQLCVLHEK | K444                | trypsin | 2 |
| 446 - 466 | 2575.21 | M <sub>ox</sub> PCAEDYLSVVLNQLCVLHEK       | S454                | trypsin | 0 |
| 446 - 472 | 3214.55 | MPCAEDYLSVVLNQLCVLHEKTPVSDR                | K466                | trypsin | 1 |
| 446 - 472 | 3230.54 | M <sub>ox</sub> PCAEDYLSVVLNQLCVLHEKTPVSDR | T467                | trypsin | 1 |
| 446 - 472 | 3256.56 | MPCAEDYLSVVLNQLCVLHEKTPVSDR                | S454 K466           | trypsin | 1 |
| 466 - 479 | 1721.81 | KTPVSDRVTKCCTE                             | T467                | Glu-C   | 0 |
| 466 - 479 | 1763.82 | KTPVSDRVTKCCTE                             | K466 K475           | Glu-C   | 0 |
| 473 - 484 | 1507.71 | VTKCCTESLVNR                               | K475                | trypsin | 1 |
| 473 - 484 | 1549.72 | VTKCCTESLVNR                               | T474 K475           | trypsin | 1 |
| 496 - 505 | 1238.58 | TYVPKEFNAE                                 | K500                | Glu-C   | 1 |
| 501 - 521 | 2586.17 | EFNAETFTFHADICTLSEKER                      | K519                | trypsin | 1 |
| 506 - 520 | 1839.83 | TFTFHADICTLSEKE                            | K519                | Glu-C   | 1 |
| 521 - 531 | 1396.80 | RQIKKQTALVE                                | K524 K525           | Glu-C   | 0 |
| 522 - 534 | 1580.95 | QIKKQTALVELVK                              | K524 K525           | trypsin | 2 |
| 526 - 534 | 1041.61 | QTALVELVK                                  | T527                | trypsin | 0 |
| 532 - 542 | 1403.81 | LVKHKPKATKE                                | K534 K538 K541      | Glu-C   | 0 |
| 535 - 557 | 2798.43 | HKPKATKEQLKAVMDDFAAFVEK                    | K536 K538 T540 K545 | trypsin | 4 |
| 539 - 557 | 2224.11 | ATKEQLKAVMDDFAAFVEK                        | K541 K545           | trypsin | 2 |
| 539 - 560 | 2772.28 | ATKEQLKAVMDDFAAFVEKCK                      | T540 K541 K545 K557 | trypsin | 3 |
| 543 - 556 | 1624.78 | QLKAVMDDFAAFVE                             | K545                | Glu-C   | 0 |
| 546 - 560 | 1847.79 | AVMDDFAAFVEKCK                             | K557                | trypsin | 1 |
| 558 - 574 | 2158.90 | CCKADDKETCFAEEGKK                          | K560 K564           | trypsin | 3 |
| 558 - 574 | 2200.91 | CCKADDKETCFAEEGKK                          | K560 K564 K573      | trypsin | 3 |
| 561 - 573 | 1540.64 | ADDKETCFAEEGK                              | K564                | trypsin | 1 |
| 561 - 574 | 1710.74 | ADDKETCFAEEGKK                             | K564 K573           | trypsin | 2 |
| 561 - 585 | 2705.32 | ADDKETCFAEEGKKLVAASQAALGL                  | K573 K574           | trypsin | 3 |
| 565 - 585 | 2276.14 | ETCFAEEGKKLVAASQAALGL                      | K573 K574           | trypsin | 2 |
| 572 - 585 | 1367.81 | GKKLVAASQAALGL                             | K573                | Glu-C   | 0 |
| 572 - 585 | 1409.82 | GKKLVAASQAALGL                             | K573 K574           | Glu-C   | 0 |
| 574 - 585 | 1182.70 | KLVAASQAALGL                               | K574                | trypsin | 1 |

The added mass from acetate is 42, and from carbamidomethylation is 57. All 59 lysines are acetylated. 10 serines are acetylated: S5, S65, S192, S202, S287, S312, S419, S427, S435, S454. 8 threonines are acetylated: T68, T76, T79, T83, T467, T474, T527, T540. 4 tyrosines are acetylated: Y84, Y161, Y401, Y411. Each residue listed in the "acetylated" column was unequivocally identified based on the presence of diagnostic b and/or y ions.
